# Supplementary material
Source: PubMed Central journal article supplement (PMC5224360)
Supplement: pnas.1613593114.sapp.pdf [file pnas.1613593114.sapp.pdf]

1  
2 Supporting information for

3  
4 **Modifications to a *LATE MERISTEM IDENTITY-1* gene are responsible for the major leaf**  
5 **shapes of Upland cotton (*Gossypium hirsutum* L.)**

6  
7 Ryan Andres<sup>a,1</sup>, Viktoriya Coneva<sup>b</sup>, Margaret H. Frank<sup>b</sup>, John R. Tuttle<sup>a</sup>, Luis Fernando  
8 Samayoa<sup>a, c</sup>, Sang-Won Han<sup>d</sup>, Baljinder Kaur<sup>a</sup>, Linglong Zhu<sup>a</sup>, Hui Fang<sup>a</sup>, Daryl T. Bowman<sup>a</sup>,  
9 Marcela Rojas-Pierce<sup>c</sup>, Candace H. Haigler<sup>a, c</sup>, Don C. Jones<sup>c</sup>, James B. Holland<sup>a,d</sup>, Daniel H.  
10 Chitwood<sup>b,1</sup>, Vasu Kuraparthi<sup>a,1</sup>

11  
12  
13 To whom correspondence should be addressed. E-mail: [vasu\\_kuraparthi@ncsu.edu](mailto:vasu_kuraparthi@ncsu.edu) (V.K.) or  
14 [dchitwood@danforthcenter.org](mailto:dchitwood@danforthcenter.org) (D.H.C.).

15  
16  
17  
18 **This file includes:**

19 Tables and Figures

20

1 **Supplementary Tables**

2

3 **Table S1.** Chi-square analysis of a large F<sub>2</sub> population: Chi-square analysis of individual plant  
4 phenotype confirms the assumption that leaf shape in cotton is controlled by a single,  
5 incompletely dominant gene. \*Three plants were classified as ambiguous owing to stunted  
6 growth.

7

8

| <b>Phenotype</b> | <b>Observed</b> | <b>Expected (1:2:1)</b> | <b>Chi-square</b>      |
|------------------|-----------------|-------------------------|------------------------|
| Okra             | 262             | 256                     | 0.141                  |
| Heterozygous     | 509             | 512                     | 0.018                  |
| Normal           | 253             | 256                     | 0.035                  |
| <b>Total</b>     | <b>1,024*</b>   | <b>1,024</b>            | <b>0.194 (p =0.91)</b> |

1 **Table S2.** Fine mapping of the leaf shape locus ( $L-D_1$ ) using association mapping of putative candidate gene-based markers.  
2 Marker details are presented in [SI Appendix, Fig. S1](#). There was no association between leaf shape and GhLS-STS2 allowing the  
3 candidate region to be reduced to the 52 kb, four gene interval between *Gorai.002G243900* and *Gorai.002G244200* shown in Fig.  
4 2D. The near complete association between leaf shape and GhLS-SNP2 was unable to further reduce the candidate region. The  
5 large promoter variant of GhLS-STS1 was completely associated with *okra* and *super-okra* leaf shape while the smaller genic  
6 polymorphism of 13-LS-195 was completely associated with *normal* leaf shape. Individual marker data may be missing so  
7 numbers may not sum completely.  
8

| Leaf shape        | Putative candidate gene markers                       |       |                                                     |        |                                                      |     |                                                             |        |        | Total |
|-------------------|-------------------------------------------------------|-------|-----------------------------------------------------|--------|------------------------------------------------------|-----|-------------------------------------------------------------|--------|--------|-------|
|                   | GhLS-STS1<br><i>Gorai.002G244000</i><br>Promoter Size |       | 13-LS-195<br><i>Gorai.002G244000</i><br>Genic InDel |        | GhLS-SNP2<br><i>Gorai.002G244100</i><br>Intronic SNP |     | GhLS-STS2<br><i>Gorai.002G244200</i><br>3' Intergenic InDel |        |        |       |
|                   | Large                                                 | Small | 172 bp                                              | 180 bp | C                                                    | A   | 471 bp                                                      | 458 bp | 450 bp |       |
| <i>Normal</i>     | 0                                                     | 393   | 391                                                 | 0      | 363                                                  | 0   | 171                                                         | 214    | 4      | 393   |
| <i>Okra</i>       | 109                                                   | 0     | 0                                                   | 109    | 0                                                    | 101 | 34                                                          | 66     | 8      | 109   |
| <i>Sub-Okra</i>   | 0                                                     | 23    | 0                                                   | 24     | 5                                                    | 17  | 21                                                          | 1      | 1      | 24    |
| <i>Super-Okra</i> | 12                                                    | 0     | 0                                                   | 12     | 0                                                    | 6   | 0                                                           | 12     | 0      | 12    |
| <b>Total</b>      | 121                                                   | 416   | 391                                                 | 145    | 368                                                  | 124 | 226                                                         | 293    | 13     | 538   |

1 **Table S3.** Fine mapping of the leaf shape locus (*L-D<sub>1</sub>*) using isogenic lines and putative candidate gene-based markers. Marker details  
2 are presented in *SI Appendix, Fig. S1*. GhLS-STS2 failed to show association with the *normal* leaf shape, confirming that the  
3 candidate region can be reduced to the 52 kb, four gene interval between *Gorai.002G243900* and *Gorai.002G244200* shown in Fig.  
4 2D. GhLS-SNP2 remained associated with leaf shape, rendering the maker unable to further reduce the candidate region. The large  
5 promoter variant of GhLS-STS1 remained associated with *okra* and *super-okra* leaf shape while the smaller genic polymorphism of  
6 13-LS-195 remained associated with *normal* leaf shape. GhLS-SNP1 data for LA213 *okra* is missing.  
7

| Isoline                     | Putative candidate gene markers                       |       |                                                     |        |                                                      |   |                                                             |        |
|-----------------------------|-------------------------------------------------------|-------|-----------------------------------------------------|--------|------------------------------------------------------|---|-------------------------------------------------------------|--------|
|                             | GhLS-STS1<br><i>Gorai.002G244000</i><br>Promoter Size |       | 13-LS-195<br><i>Gorai.002G244000</i><br>Genic InDel |        | GhLS-SNP2<br><i>Gorai.002G244100</i><br>Intronic SNP |   | GhLS-STS2<br><i>Gorai.002G244200</i><br>3' Intergenic InDel |        |
|                             | Large                                                 | Small | 172 bp                                              | 180 bp | C                                                    | A | 471 bp                                                      | 458 bp |
| <i>LA213-sub-okra</i>       |                                                       | X     |                                                     | X      |                                                      | X | X                                                           |        |
| <i>LA213-super-okra</i>     | X                                                     |       |                                                     | X      |                                                      | X |                                                             | X      |
| <i>LA213-okra</i>           | X                                                     |       |                                                     | X      |                                                      |   | X                                                           |        |
| <i>Stoneville 7A-okra</i>   | X                                                     |       |                                                     | X      |                                                      | X | X                                                           |        |
| <i>LA213-normal</i>         |                                                       | X     | X                                                   |        | X                                                    |   |                                                             | X      |
| <i>Stoneville 7A-normal</i> |                                                       | X     | X                                                   |        | X                                                    |   | X                                                           |        |

1  
2  
3  
4  
5  
6  
7  
8  
9  
10

**Table S4.** The 20 *Gossypium* accessions used to sequence *GhLMII*-like genes. Sanger sequences of both *GhLMII-D1a* and *GhLMII-D1b* were collected from these 20 tetraploid cotton varieties in order to construct Fig. 3C and *SI Appendix, Fig. S6*. There are five varieties of each of the four major leaf shapes; *normal*, *okra*, *super-okra*, and *sub-okra*. A consensus sequences was determined from each group of five in order to generate a single sequence for each leaf shape at both loci.

| <b>Entry No.</b> | <b>Accession/Variety</b> | <b>Leaf shape</b> | <b>Species</b>       |
|------------------|--------------------------|-------------------|----------------------|
| 1                | NC11-2100                | Normal            | <i>G. hirsutum</i>   |
| 2                | NC11-2091                | Normal            | <i>G. hirsutum</i>   |
| 3                | Coker 312                | Normal            | <i>G. hirsutum</i>   |
| 4                | TM-1                     | Normal            | <i>G. hirsutum</i>   |
| 5                | LA 213 Frego Bract       | Normal            | <i>G. hirsutum</i>   |
| 6                | NC05AZ21                 | Okra              | <i>G. hirsutum</i>   |
| 7                | Stoneville 7A Okra       | Okra              | <i>G. hirsutum</i>   |
| 8                | Acala Red Okra Leaf      | Okra              | <i>G. hirsutum</i>   |
| 9                | LA213 Okra               | Okra              | <i>G. hirsutum</i>   |
| 10               | Aub Okra-16              | Okra              | <i>G. hirsutum</i>   |
| 11               | Super Okra UA2-5         | Super Okra        | <i>G. hirsutum</i>   |
| 12               | Acala 6010-15-U Okra     | Super Okra        | <i>G. hirsutum</i>   |
| 13               | LA213 Super Okra         | Super Okra        | <i>G. hirsutum</i>   |
| 14               | P62Lo                    | Super Okra        | <i>G. barbadense</i> |
| 15               | Acala 6010-27-10 Okra    | Super Okra        | <i>G. hirsutum</i>   |
| 16               | TAMCOT CAMD-ES           | Sub-Okra          | <i>G. hirsutum</i>   |
| 17               | DPL 5540-85              | Sub-Okra          | <i>G. hirsutum</i>   |
| 18               | MD 65-11                 | Sub-Okra          | <i>G. hirsutum</i>   |
| 19               | DES 422                  | Sub-Okra          | <i>G. hirsutum</i>   |
| 20               | NC05AZ06                 | Sub-Okra          | <i>G. hirsutum</i>   |

1  
2  
3

**Table S5.** Primer Sequences of the markers used in association mapping in *SI Appendix, Table S2 and S3*.

| <b>Marker Name</b> | <b>Type of Polymorphism</b> | <b><i>G. raimondii</i> Gene</b> | <b>Forward Sequence 5' → 3'</b>                    | <b>Reverse Sequence 5' → 3'</b> |
|--------------------|-----------------------------|---------------------------------|----------------------------------------------------|---------------------------------|
| <b>GhLS-STS1</b>   | 133bp Duplication           | <i>Gorai.002G244000</i>         | TACAAAGCCTACCCCATCGT                               | TGGAGAGAGGGTGGACTTGT            |
| <b>13-LS-195</b>   | Exonic 8bp InDel            | <i>Gorai.002G244000</i>         | ACCTTTTACGCAGGTGATGG                               | TCGGATATAGTCGTTTCCTGCT          |
| <b>STK4100-1</b>   | C-A SNP-KASP                | <i>Gorai.002G244100</i>         | GAAGGTGACCAAGTTCATGCTAC<br>AAACTCCTTCTGTCAGTC      | GGGCTGTATACAAAGGGGTCAACAA       |
| <b>STK4100-2</b>   | C-A SNP-KASP                | <i>Gorai.002G244100</i>         | GAAGGTCGGAGTCAACGGATTCT<br>GCTACAAACTCCTTCTGTCAGTA | GGGCTGTATACAAAGGGGTCAACAA       |
| <b>GhLS-STS2</b>   | 3' Intergenic InDel         | <i>Gorai.002G244200</i>         | TTGAAAGCCATTGTTGAAGG                               | CGGATCGTATGGTAAGTTTGC           |

4  
5

1 **Table S6.** Names and sequences of primers used in RT-PCR expression analysis. These primers were used in semi-quantitative and/or  
2 qRT-PCR studies. Primers were used to determine the expression of the specified gene in the candidate interval determined in  
3 association mapping.

4

| <b>Primer</b>                                       | <b>Forward Sequence 5' → 3'</b> | <b>Reverse Sequence 5' → 3'</b> |
|-----------------------------------------------------|---------------------------------|---------------------------------|
| <i>GhLMII-D1a</i> Expression 1                      | ACAAATCGCTGTCTGGTTCC            | TGCTTTCGACAGTCTCTTCG            |
| <i>GhLMII-D1a</i> Expression 2                      | GGGAACCTGGACTTCAACCA            | ACCCAATAAGGGGATGAAA             |
| <i>GhLMII-D1b</i> Expression 1                      | GGCACCATTTCGACCCTTTAT           | TGCCAGCTTCTTCAAATCCT            |
| <i>GhLMII-D1b</i> Expression 2                      | ACAAATCGCTGTCTGGTTCC            | GTCGCCTGTTCCACTAGCAT            |
| <i>GAPDH</i> - Positive Control                     | ATCAAGGGCACCATGACTACCACT        | ACCAGTTGAAGTCGGGACGATGTT        |
| <i>UBI14</i> Positive Control for <i>GhLMII-D1a</i> | GCTTACGGGAAAGACGATCA            | GAAGATCTGCATCCCACCTC            |
| <i>UBI14</i> Positive Control for <i>GhLMII-D1b</i> | GCTGGGAAACAACCTGGAAGA           | CCATTACAGGGCACAGTCCT            |
| <i>Gorai.002G44100</i> Expression 1                 | ACTTGGAAGAGGTGCTTTTCG           | TTCCGGTGCTACATAACCTCTAGT        |
| <i>Gorai.002G44100</i> Expression 2                 | GCCATTAGAGGAACTAGAGGTTATGT      | AAATGCAAAAGGGGAAGGAC            |
| <i>Gorai.002G43900</i> Expression 1                 | GATGATGAGTCTGATGGTGATGAT        | AAGCTTGATAGGTCTCCCCTTT          |
| <i>Gorai.002G43900</i> Expression 2                 | AAAGGTGGTGGTGGTAGTGG            | ATCATCACCATCAGACTCATCATC        |
| <i>GhLMII-D1b</i> VIGS 1                            | GAACACTCATATAATACGCTTAAACAT     | CTTGGTTCCTTGTCGCC               |
| <i>GhLMII-D1b</i> VIGS 2                            | CGAATCGAGCTACTTTTCGATG          | CTTGGTTCCTTGTCGCC               |

5

1  
2 **Table S7.** Genome specificity of *GhLMII-D1a* amplification for sequencing primers. Sequence differences resulting in a genome-  
3 specific primer are highlighted and underlined in **red**. *G. raimondii* and *G. arboreum* sequences were retrieved from  
4 <https://www.cottongen.org/tools/gbrowse>. \*193R is the second reverse primer used in the nested amplification of the 5' region of  
5 *GhLMII-D1a*.  
6

| <b>Primer Combination</b>        | <b>Primer</b> | <b><i>G. raimondii</i> Sequence<br/>5'→3'</b> | <b><i>G. arboreum</i> Sequence<br/>5'→3'</b> | <b>Genome Specific?</b> |
|----------------------------------|---------------|-----------------------------------------------|----------------------------------------------|-------------------------|
| <b>14-LS-5F +<br/>13-LS-145R</b> | 14-LS-5F      | GGTATTTCTACGGATCAATGTGC                       | GGTATTTCTACGGATCAATGTGC                      | No                      |
|                                  | 13-LS-145R    | TGCTTTCGACAGTCTCTTCG                          | TGCTTTC <u>AACG</u> GTCTCTTCG                | Yes                     |
|                                  | 13-LS-193R*   | TGGTTCCTTGTCACTTGTTCC                         | TGGTTCCTTGTCACTTGTTCC                        | No                      |
| <b>13-LS-145F<br/>+13-LS-</b>    | 13-LS-145F    | GGGAACTTGGACTTCAACCA                          | GGGAACTTGGACTTCAACCA                         | No                      |
|                                  | 13-LS-198R    | ATGCCAGCACGAGGTACG                            | N/A                                          | Yes                     |

7  
8  
9  
10



1  
2  
3  
4  
5  
6  
7  
8

**Table S8.** Genome specificity of *GhLMII-D1b* amplification for sequencing primers. Sequence differences resulting in a genome-specific primer are highlighted and underlined in red. *G. raimondii* and *G. arboreum* sequences were retrieved from <https://www.cottongen.org/tools/gbrowse>. \*Single base pair insertion may be too far from the 3' end of the primer to impact amplification.

| Primer Combination             | Primer     | <i>G. raimondii</i> Sequence<br>5'→3' | <i>G. arboreum</i> Sequence<br>5'→3'           | Genome Specific? |
|--------------------------------|------------|---------------------------------------|------------------------------------------------|------------------|
| <b>14-LS-12F + 14-LS-9R</b>    | 14-LS-12F  | TACAAAGCCTACCCCATCGT                  | TAC<br>AAGCCTACCCCATC <u>CGTTACGCTCATCC</u> GT | Yes              |
|                                | 14-LS-9R   | TGGAGAGAGGGTGGACTTGT                  | TGGAGAGAGGGTGGACTTGT                           | No               |
| <b>13-LS-200F + 13-LS-195R</b> | 13-LS-200F | ATCCCTTCTCTCGCTCTCT                   | ATCCCTTCTCTC <u>A</u> CTCTCT                   | Yes              |
|                                | 13-LS-195R | TCGGATATAGTCGTTTCCTGCT                | TCGGAT <u>C</u> ATAGTCGTTTCCTGCT               | No*              |
| <b>14-LS-9F + 13-LS-199R</b>   | 14-LS-9F   | TGGTTGTTGGGATCAACCTT                  | TGGTT <u>C</u> TGGGATCAACCT <u>A</u>           | Yes              |
|                                | 13-LS-199R | AGTAGTGAGTGGAAACTGGGT                 | AGTAGTGAGTGGAAACTGGGT                          | No               |

9  
10

1  
2  
3  
4  
5  
6

**Table S9.** *Gossypium* diploid accessions used in the genome specificity checks. These diploid cotton lines were used to confirm the genome specificity of primers detailed in [SI Appendix, Table S7 and S8](#). Primers were considered genome specific if they amplified specifically in the D genome diploids but failed to do so in *G. arboreum*.

| NC Accession No. | Species             | Genome | PI No. | Name                |
|------------------|---------------------|--------|--------|---------------------|
| 174              | <i>G. raimondii</i> | DD     | 530920 | D <sub>5-1</sub>    |
| 175              | <i>G. raimondii</i> | DD     | 530921 | D <sub>5-2</sub>    |
| 176              | <i>G. raimondii</i> | DD     | 530928 | D <sub>5-4</sub>    |
| 235              | <i>G. trilobum</i>  | DD     | 530967 | D <sub>8-5</sub>    |
| 222              | <i>G. thurberi</i>  | DD     | 530767 | D <sub>1-3</sub>    |
| 223              | <i>G. thurberi</i>  | DD     | 530768 | D <sub>1-4</sub>    |
| 260              | <i>G. thurberi</i>  | DD     | 530766 | D <sub>1-2</sub>    |
| 262              | <i>G. thurberi</i>  | DD     | 530782 | D <sub>1-18</sub>   |
| 265              | <i>G. thurberi</i>  | DD     | 530789 | D <sub>1-25</sub>   |
| 501              | <i>G. arboreum</i>  | AA     | 167906 | N/A                 |
| 503              | <i>G. arboreum</i>  | AA     | 529740 | SMA4                |
| 505              | <i>G. arboreum</i>  | AA     | 615700 | Chinese Narrow Leaf |
| 506              | <i>G. arboreum</i>  | AA     | 615701 | Soudanense          |
| 507              | <i>G. arboreum</i>  | AA     | 615750 | Punjabi 39          |
| 508              | <i>G. arboreum</i>  | AA     | 615759 | 231R                |

7  
8  
9

1  
2  
3  
4  
5  
6

**Table S10.** Primers used for sequencing *GhLMII*-like genes. These primers were used to complete the Sanger sequencing of both *LMII*-like candidate leaf shape genes. Sequencing template was purified PCR product from amplification using the primer pairs listed in *SI Appendix, Table S7 and S8*.

| Marker Name               | Orientation | Sequence 5' → 3'         |
|---------------------------|-------------|--------------------------|
| <i>GhLMII-D1a</i> Seq. 1  | Forward     | TTGAAAGCCATTGTTGAAGG     |
| <i>GhLMII-D1a</i> Seq. 2  | Reverse     | CAAAAATTCAGCCTTATTCATGC  |
| <i>GhLMII-D1a</i> Seq. 3  | Reverse     | ATGCCAGCACGAGGTACG       |
| <i>GhLMII-D1a</i> Seq. 4  | Forward     | GGAACAAGTGACAAGGAACCA    |
| <i>GhLMII-D1a</i> Seq. 5  | Reverse     | TCCAACAATGGCTTTCAACA     |
| <i>GhLMII-D1a</i> Seq. 6  | Forward     | GGGAACTTGGACTTCAACCA     |
| <i>GhLMII-D1a</i> Seq. 7  | Forward     | TGGACTTGGGTAATGAGATGG    |
| <i>GhLMII-D1a</i> Seq. 8  | Reverse     | GGAACCAGACAGCGATTTGT     |
| <i>GhLMII-D1a</i> Seq. 9  | Reverse     | GGAGATCTCAAATTCATGAACAA  |
| <i>GhLMII-D1a</i> Seq. 10 | Reverse     | CCCAAGACAGGGTTTAACGA     |
| <i>GhLMII-D1a</i> Seq. 11 | Forward     | ACCCTTTGTTTCACGACCAG     |
| <i>GhLMII-D1a</i> Seq. 12 | Forward     | CCCAAAGCCAATGTTTTA       |
| <i>GhLMII-D1a</i> Seq. 13 | Forward     | GGTATTTCTACGGATCAATGTGC  |
| <i>GhLMII-D1a</i> Seq. 14 | Reverse     | TGGTTCCTTGTCACCTGTTCC    |
| <i>GhLMII-D1a</i> Seq. 15 | Forward     | AACCGGTTAGAGAGAGCTAAAGA  |
| <i>GhLMII-D1a</i> Seq. 16 | Reverse     | GGAAAGGTGCAATCACAGGT     |
| <i>GhLMII-D1a</i> Seq. 17 | Forward     | GGGAACTTGGACTTCAACCA     |
| <i>GhLMII-D1a</i> Seq. 18 | Reverse     | TCCATAAACCCCTTGATGTTGC   |
| <i>GhLMII-D1b</i> Seq. 1  | Forward     | TACAAAGCCTACCCCATCGT     |
| <i>GhLMII-D1b</i> Seq. 2  | Reverse     | TCATTCATTACATCAATCGTCAA  |
| <i>GhLMII-D1b</i> Seq. 3  | Forward     | TGGTTGTTGGGATCAACCTT     |
| <i>GhLMII-D1b</i> Seq. 4  | Reverse     | TGGAGAGAGGGTGGACTTGT     |
| <i>GhLMII-D1b</i> Seq. 5  | Forward     | AAGTGATGATTTGACGATTGATG  |
| <i>GhLMII-D1b</i> Seq. 6  | Reverse     | GGAACCAGACAGCGATTTGT     |
| <i>GhLMII-D1b</i> Seq. 7  | Forward     | AACTTTTGTGTTGATGAGGGATTG |
| <i>GhLMII-D1b</i> Seq. 8  | Reverse     | TCAGCCGTAGTAAGCAAGCA     |
| <i>GhLMII-D1b</i> Seq. 9  | Forward     | ACCTTTTACGCAGGTGATGG     |
| <i>GhLMII-D1b</i> Seq. 10 | Reverse     | TCGGATATAGTCGTTTCCTGCT   |
| <i>GhLMII-D1b</i> Seq. 11 | Forward     | GGCACCATTCGACCCTTTAT     |
| <i>GhLMII-D1b</i> Seq. 12 | Forward     | TGGAACCTTGGTGCACCTGTTT   |

1

2

3 **Supplementary Figures**

4

5 **Fig. S1.** Markers used in association mapping and isogenic line studies. Four novel  
6 markers: GhLS-STs1, GhLS-STs2, GhLS-SNP1 and GhLS SNP2 were developed and  
7 run in both studies along with 13-LS-195 that had previously co-segregated with leaf  
8 shape phenotype (1). Four markers: GhLS-STs1, 13-LS-195, GhLS-SNP1 and GhLS-  
9 SNP2 showed complete association with leaf shape phenotype. GhLS-STs2 showed no  
10 association with leaf shape.

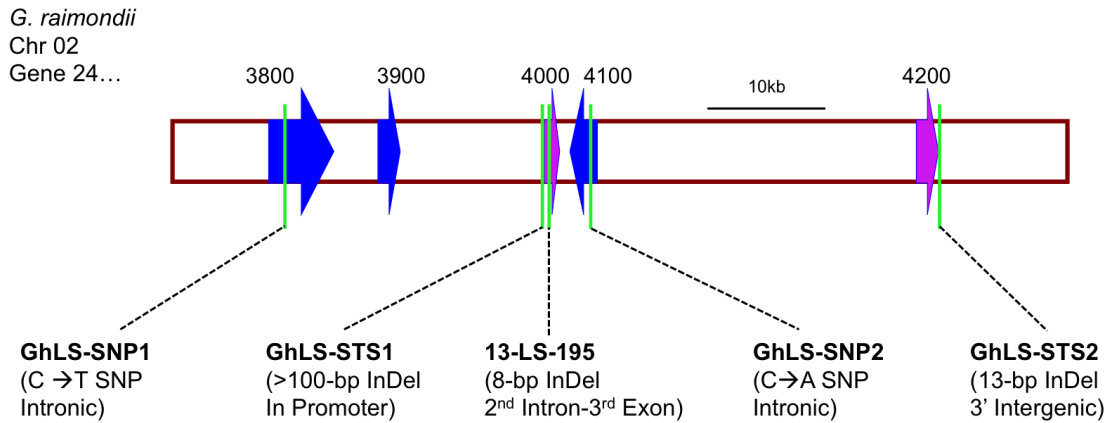

11

12

1 **Fig. S2.** Results of genome-wide association scan for leaf shape in diverse set of 406  
2 cotton inbred lines (A). Blue circles represent the  $P$ -value of each marker tested in a  
3 logistic regression model that also included the first three principal components of the  
4 population structure analysis. Three size-based markers from candidate genes are  
5 indicated by red arrows while two SNP markers are indicated by green arrows. The green  
6 and red dashed lines represent the 0.05 and 0.01 significance levels. Results of second  
7 genome-wide association scan for leaf shape in diverse set of 406 cotton inbred lines,  
8 adjusting for the effects of the candidate gene (B). Blue circles represent the  $P$ -value of  
9 each marker tested in a logistic regression model that also included the most significant  
10 candidate gene marker from the initial scan plus the first three principal components of  
11 the population structure analysis. The green and red dashed lines represent the 0.05 and  
12 0.01 significance levels.

13 A

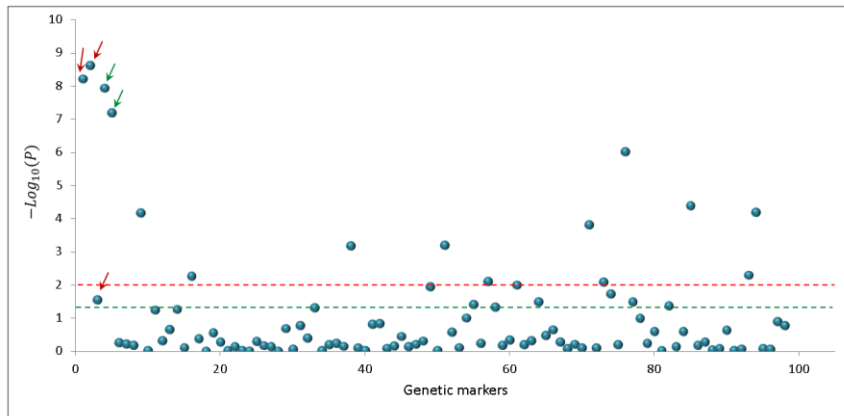

14

15 B

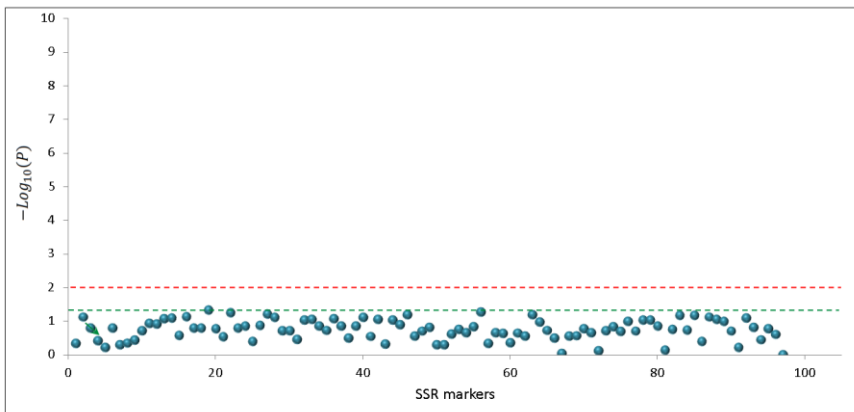

16

17

1

2 **Fig. S3.** Allelism between *okra* leaf shapes of parental accession (NC05AZ21) and  
3 isoline (LA213-*okra*). *Okra* leaf shape genes in isoline LA213-*okra* and NC05AZ21 are  
4 allelic. Leaf shape phenotypes of greenhouse grown parents and their F<sub>1</sub> hybrid at  
5 approximately 40 days after planting.

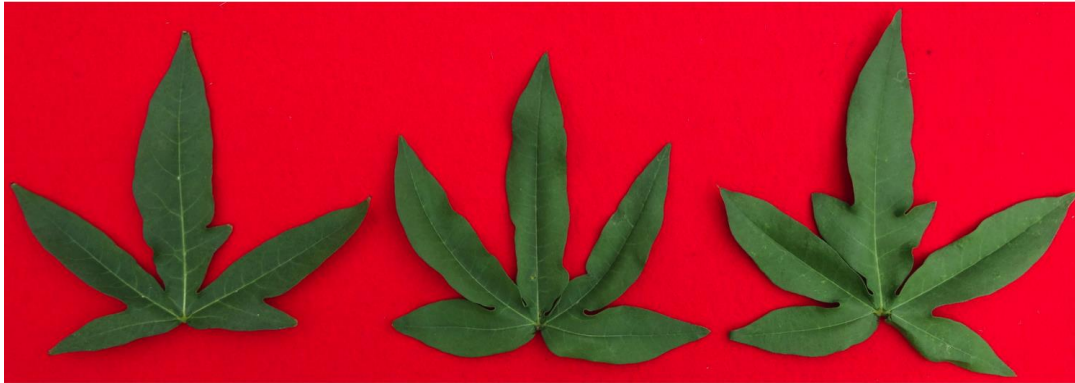

6

LA213-Okra

F<sub>1</sub>: LA213-Okra x NC05AZ21

NC05AZ21

7

8

1

2 **Fig. S4.** Semi-quantitative expression analysis of leaf shape candidate genes. Neither  
3 *GhHRA1* (*Gorai.002G243900*) nor *GhRLK1* (*Gorai.002G244100*) were expressed in  
4 critical young leaf tissue, eliminating these two genes from consideration. *GhLMI1-D1a*  
5 (*Gorai.002G244200*) appeared equally expressed across leaf shapes. *GhLMI1-D1b*  
6 (*Gorai.002G244000*) was expressed only in leaf shapes (*okra* and *super-okra*) with the  
7 larger promoter indicating differential expression of this gene could play a major role in  
8 leaf shape. Glyceraldehyde-3-phosphate dehydrogenase (*GAPDH*) was the reference  
9 gene.

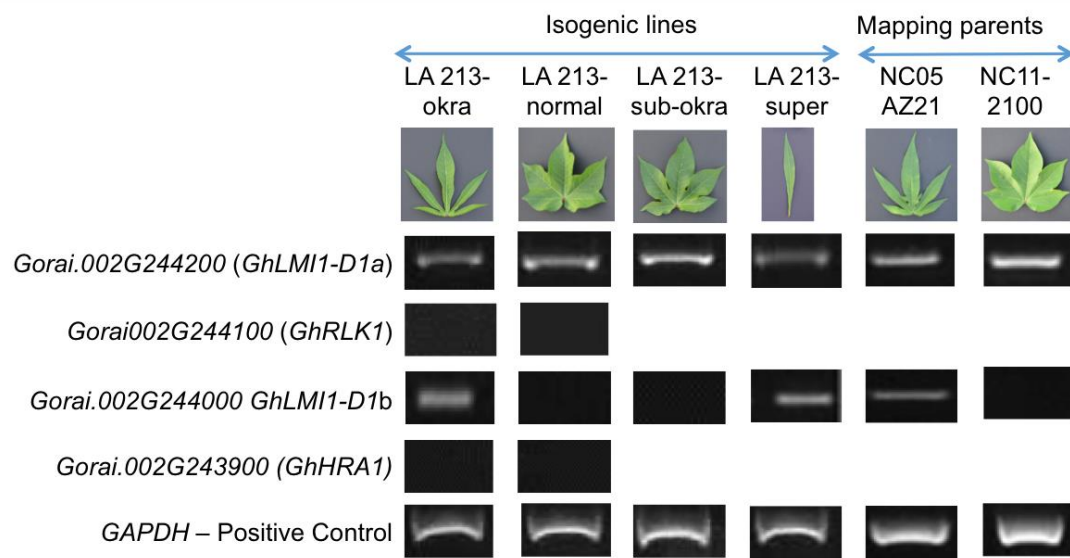

10

11

12

13

14

15

16

17

18

1 **Fig. S5.** RNA-Seq indicates that *GhLMII-D1b* (Cotton\_D\_gene\_10005014) is  
 2 significantly upregulated in three biological replicates of *okra* relative to *normal*  
 3 plastochron 2 samples, and is the only differentially expressed gene within the 52kb  
 4 candidate interval. Illumina sequenced reads were mapped to the *G. raimondii* D5 BGI-  
 5 CGP v1.0 genome, and significantly differentially expressed genes (false discovery rate  $\leq$   
 6 0.05) were identified using edgeR. Expression levels are plotted in reads per million  
 7 (RPM) with false discovery rate values listed above the bars. Gene models that are  
 8 marked with N/A did not pass the edgeR filter of having at least 1 RPM mapped across at  
 9 least 3 samples. BGI gene identifiers are listed below the bars with the corresponding JGI  
 10 gene identifiers in parentheses. *Normal* samples are plotted in blue and *okra* samples in  
 11 orange.

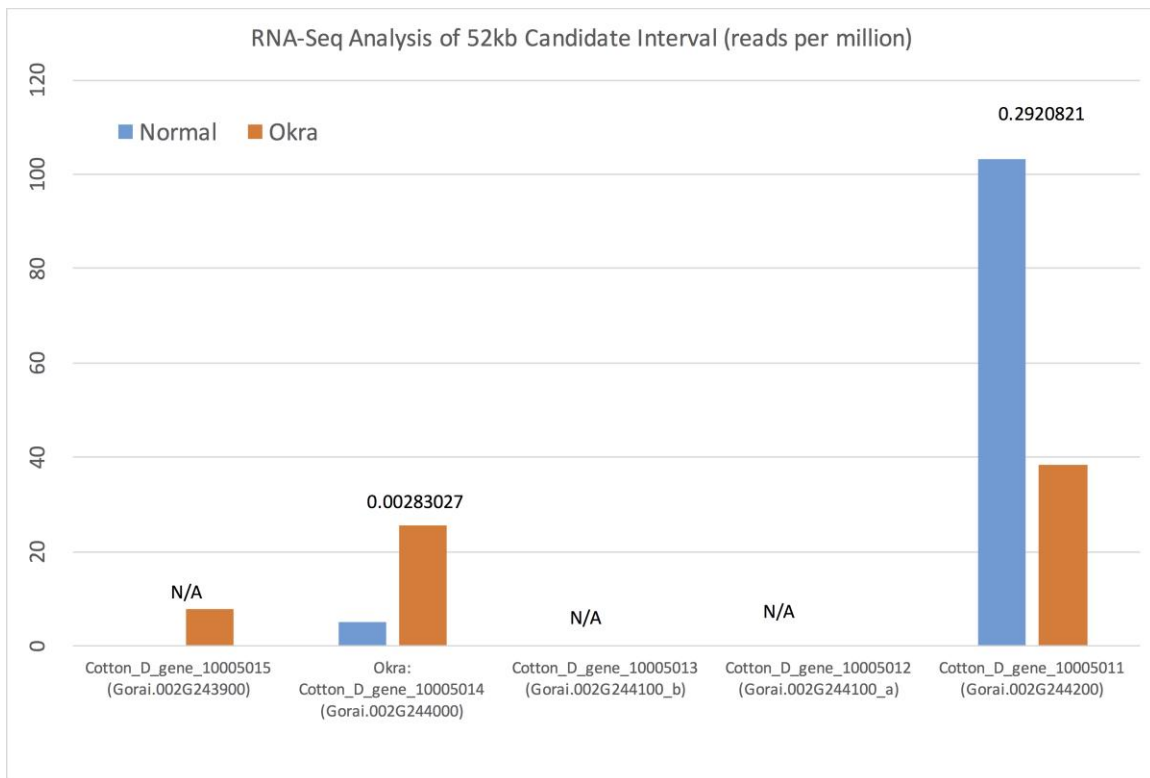

12  
 13



1

2 **Fig. S6.** Nucleotide polymorphisms of the *GhLMII-D1a* gene among different leaf shapes. Two variants of *GhLMII-D1a* were found,  
3 neither of which perfectly associated with leaf shape. Both variants encode full-length proteins and have no obvious polymorphisms  
4 that would alter function.

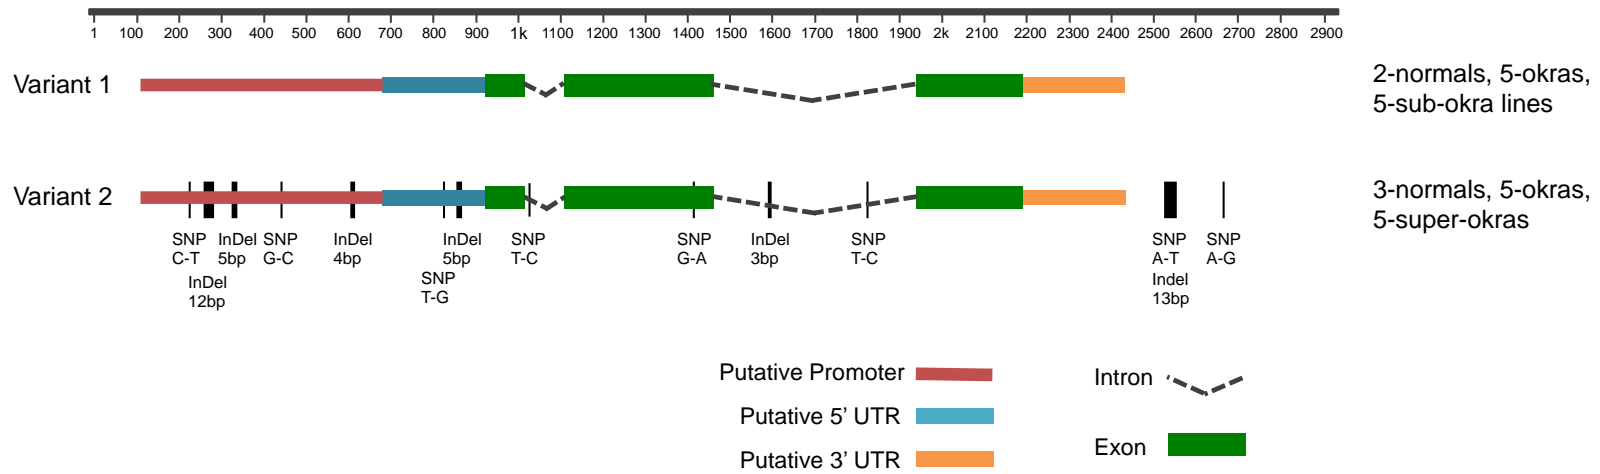

5

6

- 1 **Fig. S7.** Leaves from representative VIGS plants. True leaves five through ten from representative plants of all VIGS treatments are  
2 shown. Severe reductions in leaf lobing and sinus depth was seen in the LA213-okra TRV: *LMI1-D1b* that briefly produced normal  
3 leaves. Abolishment of viral silencing proceeded similar to that seen in the TRV: CHLI positive control treatment.

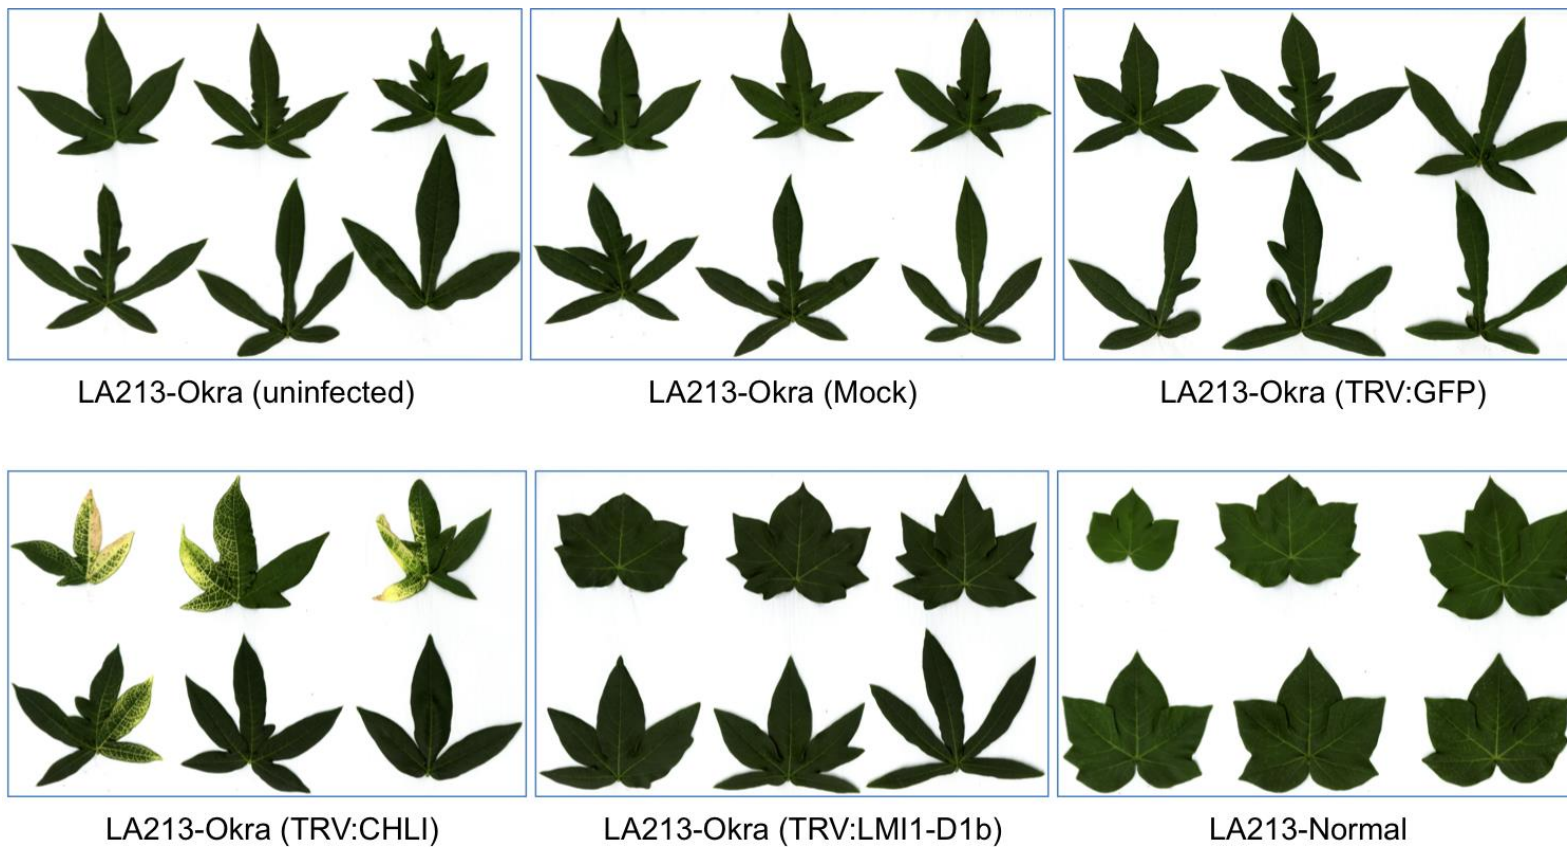

4

1 **Fig. S8.** Enriched Biological Process (BP) GO terms for differentially expressed genes  
 2 up-regulated in *okra* (A) or *normal* (B) P2 samples (Datasets S5 and S6). GO terms are  
 3 plotted in order of significance (Fisher's exact test statistic), with the most-significantly  
 4 enriched term at the top. Purple bars represent the number of occurrences of each term in  
 5 the respective dataset, while the frequency of each term that would be expected by  
 6 chance is plotted in green.

7

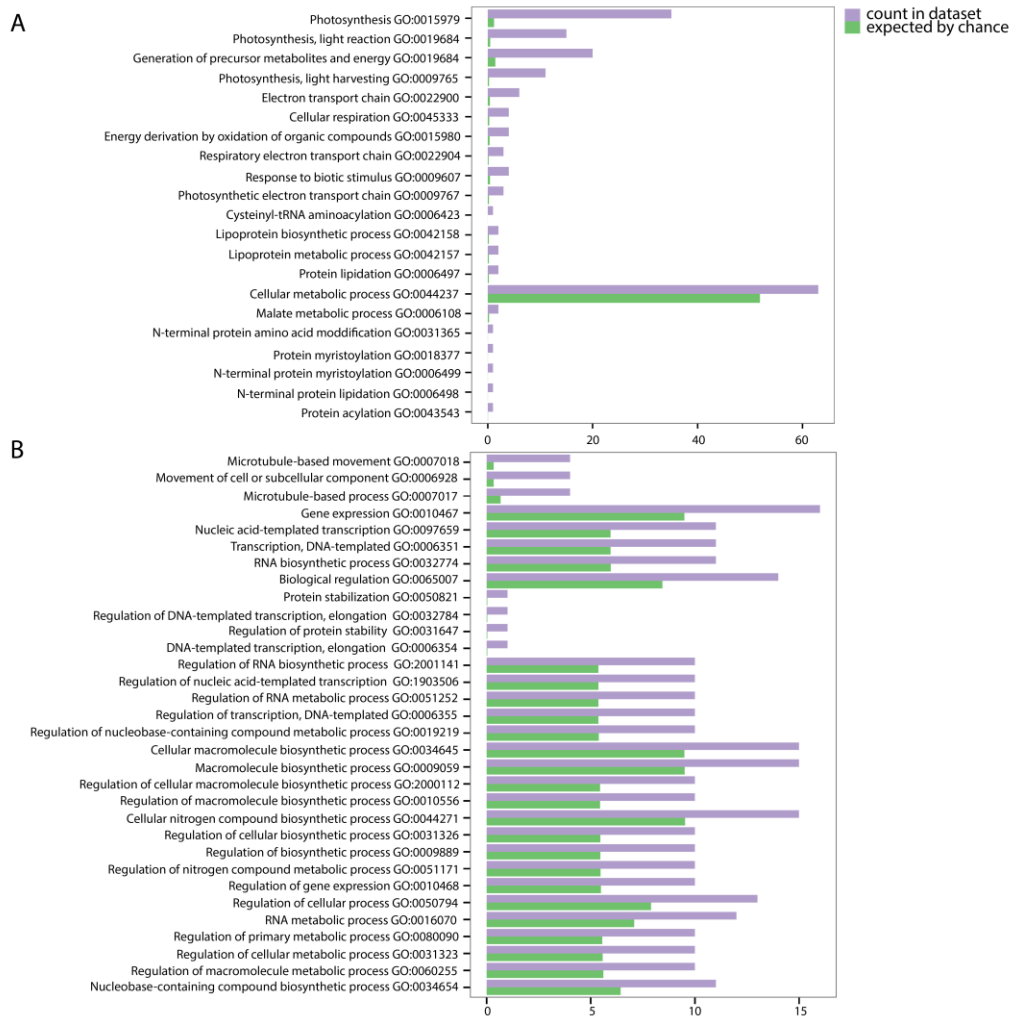

8

- 1 **Fig. S9.** GhLMI1-D1b<sup>Okra</sup> localizes to the nucleus. A GhLMI1-D1b<sup>Okra</sup>-GFP fusion construct driven by the 35S (A-C) or pUBQ10 (D-  
2 F) promoter was transiently expressed in *Nicotiana benthamiana* leaves. Signal from GhLMI1-D1b<sup>Okra</sup>-GFP (A, D), the nuclear  
3 marker RFP-Histone2B (B, E) or the merged images including brightfield (C, F) are shown. Scale bar = 20µm.

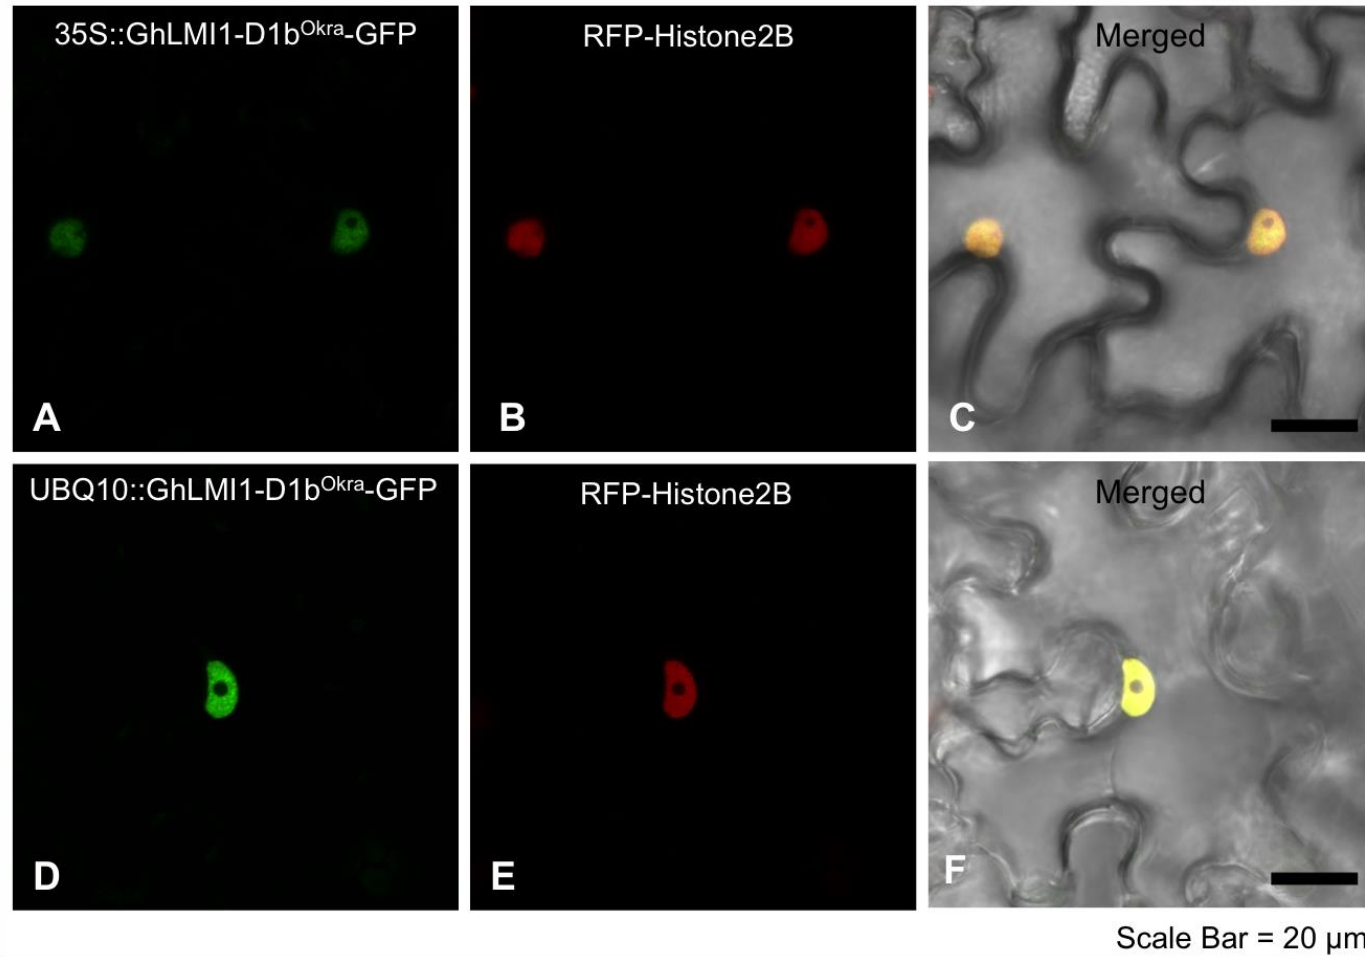

4

- 1 **Fig. S10.** Leaf shape phenotypes of the field grown parental accessions used for fine
- 2 mapping the *L-D<sub>1</sub>* locus of cotton. Left- *normal* shaped leaves of the landrace accession
- 3 NC11-2100. Right- *okra* leaf shape of the germplasm line NC05AZ21.

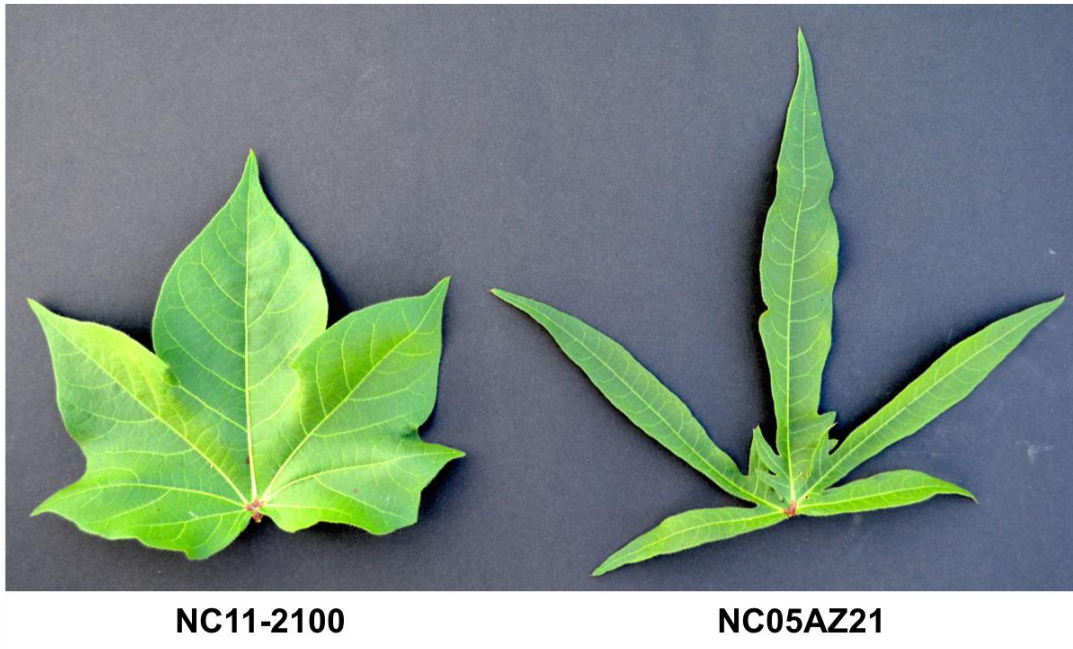

4  
5  
6

1 **SI References**

- 2 1. Andres RJ, Bowman DT, Kaur B, Kuraparthy V (2014) Mapping and genomic  
3 targeting of the major leaf shape gene (*L*) in Upland cotton (*Gossypium hirsutum*  
4 L.). *Theor Appl Genet* 127(1): 167-177.
